# Supplementary material for: Different Characteristics in Gut Microbiome between Advanced Adenoma Patients and Colorectal Cancer Patients by Metagenomic Analysis
Source: PubMed Central journal article supplement (PMC9769752; doi:10.1128/spectrum.01593-22), 2022-12-01

**Fig S1. Construction of prediction models according to differential archaea and bacteria.**

ROC curves of RF model according to differential archaea (A), evaluation diagram of the RF model (B), and the top 19 archaea were selected for predictive model construction basing on ranking (C). ROC curves of RF model according to differential bacteria (D), evaluation diagram of the RF model (E), and the top 20 bacteria were selected for predictive model construction basing on ranking (F).

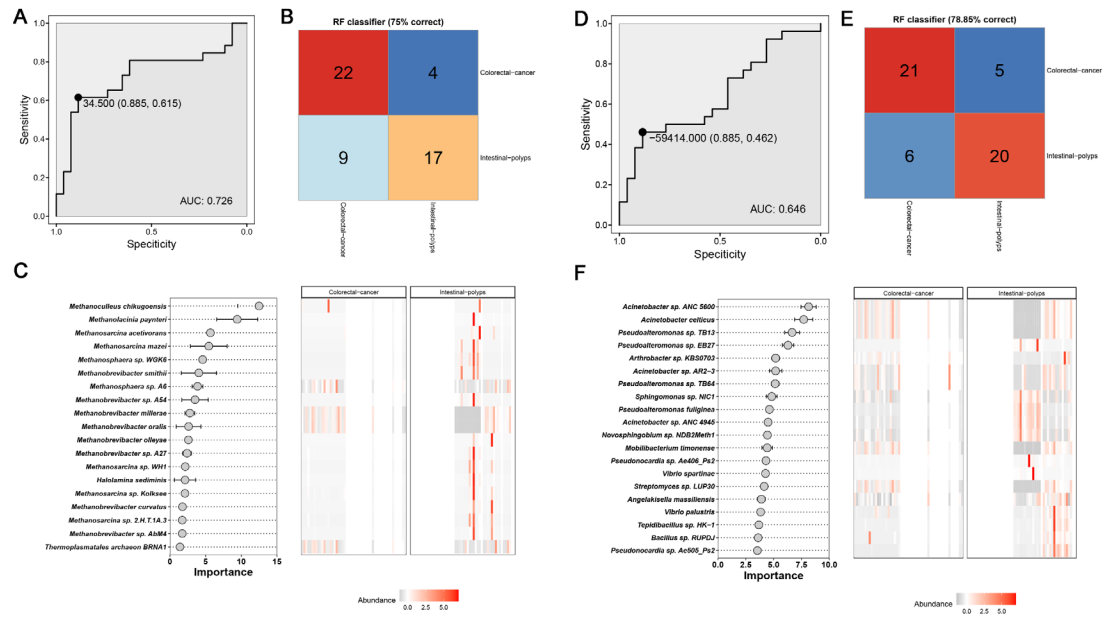

Supplement: spectrum.01593-22-s0001.pdf [file spectrum.01593-22-s0001.pdf]
